# Supplementary material for: Compost and Phosphorus/Potassium-Solubilizing Fungus Effectively Boosted Quinoa’s Physio-Biochemical Traits, Nutrient Acquisition, Soil Microbial Community, and Yield and Quality in Normal and Calcareous Soils
Source: MDPI journal article supplement (doi:10.3390/plants12173071), 2023-08-27
Supplement: s1 [file s1]

Table S1. Mean squares in ANOVA (combined ANOVA) for the effect of season, soil type, compost with phosphate (P)-potassium (K)-solubilizing *Aspergillus niger* (PK+C-AN) level, and their interactions on chlorophylls (i.e., chlorophyll *a*; chl *a*, chlorophyll *b*; chl *b*, total chlorophyll; total chl, and total photosynthetic pigments; TPP), and carotenoids, and biochemical attributes (i.e., total soluble proteins; TSPs, total soluble sugars; TSSs, free proline; FPro, reduced glutathione; rGSH, ascorbic acid; AsA, total phenolics; TP, and 2,2-diphenyl-1-picrylhydrazyl-scavenging activity; DPPH-SA) in leaves of quinoa in (SI) 2021/22 and (SII) 2022/23 winter seasons.

| S.O.V.                       | DF | Chl <i>a</i>           | Chl <i>b</i>         | Total chl            | Carotenoids          | TPP                   | TSPs                            | TSSs                 | FPro                 | rGSH                  | AsA                   | TPs                   | DPPH-SA (%)            |
|------------------------------|----|------------------------|----------------------|----------------------|----------------------|-----------------------|---------------------------------|----------------------|----------------------|-----------------------|-----------------------|-----------------------|------------------------|
|                              |    | (mg cm <sup>-2</sup> ) |                      |                      |                      |                       | (mg g <sup>-1</sup> dry weight) |                      |                      |                       |                       |                       |                        |
| Replicate (R)                | 2  | 0.013                  | 0.214                | 0.141                | 0.002                | 0.124                 | 0.013                           | 0.457                | 0.012                | 0.028                 | 0.094                 | 0.063                 | 0.421                  |
| Season (S)                   | 1  | 0.179 <sup>ns</sup>    | 0.027 <sup>ns</sup>  | 0.351 <sup>ns</sup>  | 0.497 <sup>ns</sup>  | 0.014 <sup>ns</sup>   | 0.058 <sup>ns</sup>             | 0.0214 <sup>ns</sup> | 0.058 <sup>ns</sup>  | 0.056 <sup>ns</sup>   | 0.056 <sup>ns</sup>   | 0.213 <sup>**</sup>   | 0.122 <sup>ns</sup>    |
| R × S (Error)                | 2  | 0.808                  | 0.120                | 0.882                | 0.041                | 0.907                 | 0.288                           | 0.019                | 0.021                | 0.061                 | 0.084                 | 0.003                 | 0.792                  |
| Soil type (ST)               | 1  | 39.608 <sup>**</sup>   | 36.640 <sup>**</sup> | 152.44 <sup>**</sup> | 16.068 <sup>**</sup> | 267.489 <sup>**</sup> | 49.601 <sup>**</sup>            | 74.176 <sup>**</sup> | 0.157 <sup>ns</sup>  | 303.072 <sup>**</sup> | 4.930 <sup>**</sup>   | 655.220 <sup>**</sup> | 311.839 <sup>**</sup>  |
| S × ST                       | 1  | 1.049                  | 3.617                | 0.771                | 1.298                | 0.069                 | 0.381                           | 0.236                | 0.002                | 0.003                 | 0.097                 | 0.020                 | 0.090                  |
| R × S × ST (Error)           | 4  | 1.028                  | 0.883                | 2.421                | 0.087                | 2.739                 | 0.084                           | 0.017                | 0.064                | 0.021                 | 0.068                 | 0.050                 | 0.134                  |
| PK+C-AN level                | 5  | 131.121 <sup>**</sup>  | 8.008 <sup>**</sup>  | 198.78 <sup>**</sup> | 5.087 <sup>**</sup>  | 264.801 <sup>**</sup> | 135.607 <sup>**</sup>           | 25.271 <sup>**</sup> | 8.102 <sup>**</sup>  | 94.345 <sup>**</sup>  | 150.140 <sup>**</sup> | 43.055 <sup>**</sup>  | 2239.624 <sup>**</sup> |
| S × PK+C-AN                  | 5  | 4.568                  | 0.626                | 6.371                | 0.572                | 6.235                 | 0.081                           | 0.0465               | 0.117                | 0.067                 | 0.069                 | 0.024                 | 1.354                  |
| ST × PK+C-AN                 | 5  | 9.371 <sup>**</sup>    | 0.792 <sup>ns</sup>  | 3.372 <sup>*</sup>   | 1.192 <sup>**</sup>  | 8.999 <sup>*</sup>    | 10.276 <sup>**</sup>            | 4.810 <sup>**</sup>  | 37.461 <sup>**</sup> | 19.749 <sup>**</sup>  | 20.654 <sup>**</sup>  | 7.751 <sup>**</sup>   | 352.407 <sup>**</sup>  |
| S × ST × PK+C-AN             | 5  | 1.724                  | 0.368                | 1.981                | 0.290                | 1.521                 | 0.038                           | 0.040                | 0.034                | 0.018                 | 0.073                 | 0.018                 | 2.390                  |
| R × S × ST × PK+C-AN (Error) | 40 | 2.509                  | 0.360                | 2.551                | 0.166                | 2.81                  | 0.076                           | 0.044                | 0.043                | 0.034                 | 0.045                 | 0.039                 | 0.973                  |
| Total                        | 71 |                        |                      |                      |                      |                       |                                 |                      |                      |                       |                       |                       |                        |

\* and \*\* indicate differences at  $p \leq 0.05$  and  $p \leq 0.01$  probability level, respectively. ns= not significant difference.

Table S2. Mean squares in ANOVA (combined ANOVA) for the effect of season, soil type, compost with phosphate (P)-potassium (K)-solubilizing *Aspergillus niger* (PK+C-AN) level, and their interactions on leaf macro and micro-nutrients (i.e., nitrogen; N, phosphorus; P, potassium; K<sup>+</sup>, calcium; Ca<sup>2+</sup>, iron; Fe<sup>2+</sup>, zinc; Zn<sup>2+</sup>, and manganese; Mn<sup>2+</sup>) contents and seed proximate chemical composition (i.e., crude protein, ash, crude lipid, crude fiber, and Carbohydrates) of quinoa in (SI) 2021/22 and (SII) 2022/23 winter seasons.

|                              |    | N                               | P                   | K <sup>+</sup> | Ca <sup>2+</sup>    | Fe <sup>2+</sup> | Zn <sup>2+</sup>     | Mn <sup>2+</sup> | Crude protein | Ash     | Crude lipid         | Crude fiber | Carbohydrates |
|------------------------------|----|---------------------------------|---------------------|----------------|---------------------|------------------|----------------------|------------------|---------------|---------|---------------------|-------------|---------------|
|                              |    | (mg g <sup>-1</sup> dry weight) |                     |                |                     |                  |                      |                  | (% )          |         |                     |             |               |
| Replicate (R)                | 2  | 0.001                           | 0.060               | 0.013          | 7.514               | 6.573E-04        | 0.0006               | 0.001            | 0.081         | 0.025   | 0.006               | 0.002       | 0.307         |
| Season (S)                   | 1  | 27.572**                        | 0.022 <sup>ns</sup> | 35.420**       | 1.531 <sup>ns</sup> | 2.387E+00**      | 0.0001 <sup>ns</sup> | 3.578**          | 3.373**       | 0.352** | 7.752**             | 0.553**     | 58.310**      |
| R × S (Error)                | 2  | 0.024                           | 0.046               | 0.005          | 1.167               | 1.232E-03        | 0.004                | 0.0004           | 0.00002       | 0.00002 | 0.00002             | 0.00009     | 0.0002        |
| Soil type (ST)               | 1  | 78.588**                        | 0.300**             | 263.543**      | 61.420**            | 3.293E+01**      | 2.000**              | 156.498**        | 86.559**      | 1.202** | 2.606**             | 3.345**     | 417.135**     |
| S × ST                       | 1  | 3.482                           | 0.00003             | 0.058          | 0.031               | 9.665E+00        | 0.288                | 18.352           | 0.0201        | 0.0008  | 0.007               | 0.002       | 0.379         |
| R × S × ST (Error)           | 4  | 0.608                           | 0.009               | 0.005          | 0.069               | 4.965E-05        | 0.0006               | 0.001            | 0.0181        | 0.0041  | 0.022               | 0.001       | 0.046         |
| PK+C-AN level                | 5  | 18.170**                        | 6.941**             | 321.478**      | 258.254**           | 1.476E+01**      | 0.5700**             | 2.311**          | 2.620**       | 3.428** | 0.093 <sup>ns</sup> | 0.329**     | 9.681**       |
| S × PK+C-AN                  | 5  | 1.209                           | 0.001               | 5.920          | 0.065               | 7.382E+00        | 0.080                | 0.417            | 0.0006        | 0.002   | 0.0003              | 0.0002      | 0.006         |
| ST × PK+C-AN                 | 5  | 2.737**                         | 0.151**             | 18.477**       | 1.487 <sup>ns</sup> | 4.149E+00**      | 0.034**              | 1.041**          | 2.634**       | 0.966** | 0.213**             | 0.043**     | 7.037**       |
| S × ST × PK+C-AN             | 5  | 0.701                           | 0.006               | 31.646         | 0.115               | 5.194E+00        | 0.009                | 0.172            | 0.0006        | 0.0006  | 0.0006              | 0.00003     | 0.006         |
| R × S × ST × PK+C-AN (Error) | 40 | 0.181                           | 0.028               | 0.014          | 0.980               | 9.451E-04        | 0.002                | 0.0012           | 0.009         | 0.0141  | 0.049               | 0.0008      | 0.131         |
| Total                        | 71 |                                 |                     |                |                     |                  |                      |                  |               |         |                     |             |               |

\* and \*\* indicate differences at  $p \leq 0.05$  and  $p \leq 0.01$  probability level, respectively. ns= not significant difference.

Table S3. Mean squares in ANOVA (combined ANOVA) for the effect of season, soil type, compost with phosphate (P)-potassium (K)-solubilizing *Aspergillus niger* (PK+C-AN) level, and their interactions on phytochemicals (i.e., total phenolic compounds; TPC and total flavonoid compounds; TFC), antioxidant activity (i.e., half-maximal inhibitory concentration; IC50 and anti-radical power; ARP), and mineral (i.e., phosphorus; P, potassium; K<sup>+</sup>, calcium; Ca<sup>2+</sup>, magnesium; Mg<sup>2+</sup>, sodium; Na<sup>+</sup>, iron; Fe<sup>2+</sup>, and zinc; Zn<sup>2+</sup>) contents of quinoa's seeds grown in (SI) 2021/22 and (SII) 2022/23 winter seasons.

| S.O.V.                       | DF | TPC                               | TFC       | IC50 (mg ml <sup>-1</sup> ) | ARP      | P                                | K <sup>+</sup> | Ca <sup>2+</sup>     | Mg <sup>2+</sup> | Na <sup>+</sup> | Fe <sup>2+</sup> | Zn <sup>2+</sup> |
|------------------------------|----|-----------------------------------|-----------|-----------------------------|----------|----------------------------------|----------------|----------------------|------------------|-----------------|------------------|------------------|
|                              |    | (mg 100 <sup>-1</sup> g dry seed) |           |                             |          | (g 100 <sup>-1</sup> g dry seed) |                |                      |                  |                 |                  |                  |
| Replicate (R)                | 2  | 0.948                             | 6.264     | 0.00035                     | 0.0064   | 0.0030                           | 0.00004        | 0.0045               | 3.472E-07        | 1.389E-06       | 3.587E-06        | 2.045E-06        |
| Season (S)                   | 1  | 71.875**                          | 27.240**  | 0.0039**                    | 0.1291** | 0.0001 <sup>ns</sup>             | 0.1071**       | 0.0184 <sup>ns</sup> | 1.038E+00**      | 3.001E-02**     | 1.413E-01**      | 1.200E-02**      |
| R × S (Error)                | 2  | 0.000                             | 0.004     | 0.0000001                   | 0.000002 | 0.00003                          | 0.00001        | 0.0148               | 3.472E-07        | 4.167E-06       | 6.597E-08        | 2.545E-06        |
| Soil type (ST)               | 1  | 654.546**                         | 294.826** | 0.0541**                    | 1.9149** | 0.0070**                         | 0.7972**       | 0.6142**             | 8.012E-01**      | 1.242E-01**     | 1.486E-02**      | 3.563E-03**      |
| S × ST                       | 1  | 0.143                             | 0.049     | 0.000016                    | 0.0006   | 0.00007                          | 0.00018        | 0.00004              | 1.545E-01        | 2.939E-03       | 1.427E-02        | 2.695E-03        |
| R × S × ST (Error)           | 4  | 0.546                             | 0.575     | 0.00005                     | 0.0056   | 0.0004                           | 0.00002        | 0.00160              | 2.431E-06        | 1.389E-06       | 5.743E-06        | 1.280E-05        |
| PK+C-AN level                | 5  | 1145.287**                        | 682.250** | 0.0433**                    | 1.5076** | 0.0837**                         | 0.9725**       | 0.6705**             | 3.572E-01**      | 1.929E-02**     | 1.143E-01**      | 3.523E-03**      |
| S × PK+C-AN                  | 5  | 0.250                             | 0.331     | 0.00001                     | 0.0004   | 0.00007                          | 0.0179         | 0.0009               | 3.934E-02        | 3.049E-03       | 2.541E-02        | 2.759E-04        |
| ST × PK+C-AN                 | 5  | 13.888**                          | 17.991**  | 0.00049**                   | 0.0523** | 0.00116**                        | 0.0559**       | 0.0050 <sup>ns</sup> | 1.248E-01**      | 4.631E-04**     | 8.789E-03**      | 2.728E-04**      |
| S × ST × PK+C-AN             | 5  | 0.003                             | 0.026     | 0.0000001                   | 0.00002  | 0.00002                          | 0.0958         | 0.0002               | 2.054E-02        | 1.412E-03       | 8.705E-03        | 4.841E-04        |
| R × S × ST × PK+C-AN (Error) | 40 | 1.312                             | 1.003     | 0.00012                     | 0.0042   | 0.0002                           | 0.00004        | 0.0034               | 4.722E-06        | 2.917E-06       | 8.197E-06        | 9.978E-06        |
| Total                        | 71 |                                   |           |                             |          |                                  |                |                      |                  |                 |                  |                  |

\* and \*\* indicate differences at  $p \leq 0.05$  and  $p \leq 0.01$  probability level, respectively. ns= not significant difference.

Table S4. Mean squares in ANOVA (combined ANOVA) for the effect of season, soil type, compost with phosphate (P)-potassium (K)-solubilizing *Aspergillus niger* (PK+C-AN) level, and their interactions on total microbial community (i.e., phosphorus solubilizing microorganisms; PSMs and *Azotobacter* sp.) at the end of experiment in rhizosphere soil and seed yield and yield-related attributes of quinoa and harvest index (HI) of quinoa in (SI) 2021/22 and (SII) 2022/23 winter seasons.

| S.O.V.                       | DF | PSMs                                        | Azotobacter sp.     | Plant height (cm) | Plant dry weight (g) | Hectoliter weight (kg hL <sup>-1</sup> ) | Seed yield            | Biological yield    | HI (%)               |
|------------------------------|----|---------------------------------------------|---------------------|-------------------|----------------------|------------------------------------------|-----------------------|---------------------|----------------------|
|                              |    | (cfu× 10 <sup>3</sup> g <sup>-1</sup> soil) |                     |                   |                      |                                          | (t ha <sup>-1</sup> ) |                     |                      |
| Replicate (R)                | 2  | 0.012                                       | 0.116               | 18.514            | 2.413                | 1.186                                    | 0.077                 | 0.304               | 21.610               |
| Season (S)                   | 1  | 0.347**                                     | 0.002 <sup>ns</sup> | 88.889*           | 4.180 <sup>ns</sup>  | 0.239 <sup>ns</sup>                      | 0.463 <sup>ns</sup>   | 2.673 <sup>ns</sup> | 2.210 <sup>ns</sup>  |
| R × S (Error)                | 2  | 0.004                                       | 0.740               | 4.264             | 1.230                | 0.688                                    | 0.065                 | 0.559               | 9.940                |
| Soil type (ST)               | 1  | 18.000**                                    | 132.845**           | 6460.056**        | 2526.053**           | 8.103**                                  | 4.415**               | 72.946**            | 1482.140**           |
| S × ST                       | 1  | 0.027                                       | 0.390               | 40.500            | 0.324                | 51.219                                   | 0.073                 | 1.100               | 270.890              |
| R × S × ST (Error)           | 4  | 0.021                                       | 0.189               | 15.861            | 0.318                | 0.366                                    | 0.015                 | 0.121               | 26.040               |
| PK+C-AN level                | 5  | 30.000**                                    | 92.898**            | 334.256**         | 233.128**            | 26.818**                                 | 3.090**               | 12.343**            | 46.000**             |
| S × PK+C-AN                  | 5  | 0.029                                       | 0.147               | 1.989             | 2.941                | 1.894                                    | 0.028                 | 0.257               | 15.660               |
| ST × PK+C-AN                 | 5  | 51.600**                                    | 28.602**            | 13.156*           | 38.116**             | 2.186**                                  | 0.431**               | 1.477**             | 28.350 <sup>ns</sup> |
| S × ST × PK+C-AN             | 5  | 0.026                                       | 0.482               | 18.933            | 2.170                | 1.720                                    | 0.017                 | 0.784               | 47.370               |
| R × S × ST × PK+C-AN (Error) | 40 | 0.008                                       | 0.302               | 4.858             | 0.645                | 0.476                                    | 0.022                 | 0.140               | 13.080               |
| Total                        | 71 |                                             |                     |                   |                      |                                          |                       |                     |                      |

\* and \*\* indicate differences at  $p \leq 0.05$  and  $p \leq 0.01$  probability level, respectively. ns= not significant difference.

Table S5. Individual effect of soil type and compost with phosphate (P)-potassium (K)-solubilizing *Aspergillus niger* (PK+C-AN) level on leaf chlorophylls, and carotenoids of quinoa grown in (SI) 2021/22 and (SII) 2022/23 winter seasons.

| Treatment         | Chl <i>a</i><br>(mg cm <sup>-2</sup> ) | Chl <i>b</i>        | Total chl           | Carotenoids         | TPP                 |
|-------------------|----------------------------------------|---------------------|---------------------|---------------------|---------------------|
| Season (S)        |                                        |                     |                     |                     |                     |
| SI                | 27.1±0.6a                              | 6.05±0.19a          | 33.2±0.8a           | 8.10±0.17a          | 41.3±0.9a           |
| SII               | 27.0±0.6a                              | 6.01±0.22a          | 33.1±0.7a           | 8.26±0.14a          | 41.3±0.8a           |
| Soil type (ST)    |                                        |                     |                     |                     |                     |
| Normal (Nor)      | 27.8±0.6a                              | 6.75±0.18a          | 34.6±0.7a           | 8.65±0.11a          | 43.2±0.8a           |
| Calcareous (Calc) | 26.3±0.5b                              | 5.32±0.16b          | 31.7±0.6b           | 7.71±0.16b          | 39.4±0.8b           |
| PK+C-AN level     |                                        |                     |                     |                     |                     |
| PK100%            | 25.3±0.6d                              | 5.00±0.25d          | 30.3±0.7e           | 8.08±0.35c          | 38.4 ±1.0e          |
| PK100%+C-AN       | 32.5±0.8a                              | 7.22±0.24a          | 39.7±0.9a           | 9.25±0.17a          | 48.9±1.0a           |
| PK75%+C-AN        | 28.7±0.5b                              | 6.55±0.28b          | 35.2±0.6b           | 8.51±0.08b          | 43.7±0.6b           |
| PK50%+C-AN        | 27.3±0.4c                              | 6.20±0.31bc         | 33.5±0.6c           | 8.03±0.15c          | 41.5±0.7c           |
| PK25%+C-AN        | 26.1±0.4cd                             | 5.94±0.31c          | 32.0±0.7d           | 7.93±0.21c          | 40.0±0.8d           |
| PK0%+C-AN         | 22.7±0.2e                              | 5.28±0.37d          | 28.0±0.3f           | 7.30±0.21d          | 35.3±0.4f           |
| <i>p</i> -value   |                                        |                     |                     |                     |                     |
| S                 | 0.684 <sup>ns</sup>                    | 0.681 <sup>ns</sup> | 0.595 <sup>ns</sup> | 0.074 <sup>ns</sup> | 0.914 <sup>ns</sup> |
| ST                | 0.003 <sup>**</sup>                    | 0.003 <sup>**</sup> | 0.001 <sup>**</sup> | <.001 <sup>**</sup> | <.001 <sup>**</sup> |
| PK+C-AN           | <.001 <sup>**</sup>                    | <.001 <sup>**</sup> | <.001 <sup>**</sup> | <.001 <sup>**</sup> | <.001 <sup>**</sup> |

Values are means ± standard error (n=3). \*\* indicates differences at  $p \leq 0.01$  probability level, respectively. ns= not significant difference. Mean values for each factor followed by the same lower-case-letter in each column are not significantly different according to the Duncan test ( $p \leq 0.05$ ). PK100%= 72 kg P<sub>2</sub>O<sub>5</sub> ha<sup>-1</sup> + 60 kg K<sub>2</sub>O ha<sup>-1</sup>, PK75%= 54 kg P<sub>2</sub>O<sub>5</sub> ha<sup>-1</sup> + 45 kg K<sub>2</sub>O ha<sup>-1</sup>, PK50%= 36 kg P<sub>2</sub>O<sub>5</sub> ha<sup>-1</sup> + 30 kg K<sub>2</sub>O ha<sup>-1</sup>, PK25%= 18 kg P<sub>2</sub>O<sub>5</sub> ha<sup>-1</sup> + 15 kg K<sub>2</sub>O ha<sup>-1</sup>, PK0%= 0 kg P<sub>2</sub>O<sub>5</sub> ha<sup>-1</sup> + 0 kg K<sub>2</sub>O ha<sup>-1</sup>, and compost was added with a rate of 20 t ha<sup>-1</sup>. Chlorophyll a (Chl *a*), chlorophyll b (Chl *b*), total chlorophyll (Total chl), and total photosynthetic pigments (TPP).

Table S6. Individual effect of soil type and compost with phosphate (P)-potassium (K)-solubilizing *Aspergillus niger* (PK+C-AN) level on leaf biochemical attributes of quinoa grown in (Si) 2021/22 and (Sii) 2022/23 winter seasons.

| Treatment         | TSPs<br>(mg g <sup>-1</sup> dry weight) | TSSs                | FPro                | rGSH                | AsA                 | TPs                 | DPPH-SA<br>(%)      |
|-------------------|-----------------------------------------|---------------------|---------------------|---------------------|---------------------|---------------------|---------------------|
| Season (S)        |                                         |                     |                     |                     |                     |                     |                     |
| SI                | 16.5±0.56a                              | 13.2±0.31a          | 16.1±0.31a          | 17.2±0.59a          | 19.5±0.59a          | 15.5±0.60a          | 62.5±2.3a           |
| SII               | 16.6±0.55a                              | 13.2±0.29a          | 16.0±0.30a          | 17.2±0.59a          | 19.5±0.58a          | 15.4±0.60a          | 62.4±2.3a           |
| Soil type (ST)    |                                         |                     |                     |                     |                     |                     |                     |
| Normal (Nor)      | 15.7±0.53b                              | 12.2±0.14b          | 16.1±0.29a          | 19.2±0.62a          | 19.2±0.75b          | 18.5±0.40a          | 60.3±2.6b           |
| Calcareous (Calc) | 17.4±0.55a                              | 14.2±0.32a          | 16.0±0.32a          | 15.1±0.26b          | 19.8±0.35a          | 12.4±0.20b          | 64.5±1.9a           |
| PK+C-AN level     |                                         |                     |                     |                     |                     |                     |                     |
| PK100%            | 14.6±0.07d                              | 13.5±0.30c          | 14.6±0.30c          | 19.0±0.80b          | 22.1±0.24b          | 16.0±0.75b          | 73.0±1.5b           |
| PK100%+C-AN       | 21.8±0.07a                              | 15.4±0.62a          | 16.6±0.60a          | 22.0±1.33a          | 25.4±0.59a          | 18.7±1.28a          | 81.1±1.0a           |
| PK75%+C-AN        | 19.1±0.43b                              | 14.0±0.46b          | 16.4±0.28a          | 16.5±0.30c          | 18.6±0.30c          | 15.9±1.04b          | 64.9±2.5c           |
| PK50%+C-AN        | 17.0±0.73c                              | 12.9±0.18d          | 16.6±0.08a          | 15.8±0.46d          | 17.0±0.38e          | 15.0±1.01c          | 60.8±2.4d           |
| PK25%+C-AN        | 14.1±0.15e                              | 12.0±0.18e          | 16.5±0.34a          | 15.1±0.41e          | 17.3±0.34d          | 13.9±0.73d          | 49.8±0.7e           |
| PK0%+C-AN         | 13.0±0.22f                              | 11.3±0.15f          | 15.6±0.89b          | 14.7±0.42f          | 16.5±0.31f          | 13.4±0.65e          | 45.0±0.8f           |
| p-value           |                                         |                     |                     |                     |                     |                     |                     |
| S                 | 0.698 <sup>ns</sup>                     | 0.401 <sup>ns</sup> | 0.239 <sup>ns</sup> | 0.441 <sup>ns</sup> | 0.502 <sup>ns</sup> | 0.014 <sup>**</sup> | 0.502 <sup>ns</sup> |
| ST                | <.001 <sup>**</sup>                     | <.001 <sup>**</sup> | 0.193 <sup>ns</sup> | <.001 <sup>**</sup> | 0.001 <sup>**</sup> | <.001 <sup>**</sup> | <.001 <sup>**</sup> |
| PK+C-AN           | <.001 <sup>**</sup>                     | <.001 <sup>**</sup> | <.001 <sup>**</sup> | <.001 <sup>**</sup> | <.001 <sup>**</sup> | <.001 <sup>**</sup> | <.001 <sup>**</sup> |

Values are means ± standard error (n=3). \*\* indicates difference at  $p \leq 0.01$  probability level. ns= not significant difference. Mean values for each factor followed by the same lower-case-letter in each column are not significantly different according to the Duncan test ( $p \leq 0.05$ ). PK<sub>100%</sub>= 72 kg P<sub>2</sub>O<sub>5</sub> ha<sup>-1</sup> + 60 kg K<sub>2</sub>O ha<sup>-1</sup>, PK<sub>75%</sub>= 54 kg P<sub>2</sub>O<sub>5</sub> ha<sup>-1</sup> + 45 kg K<sub>2</sub>O ha<sup>-1</sup>, PK<sub>50%</sub>= 36 kg P<sub>2</sub>O<sub>5</sub> ha<sup>-1</sup> + 30 kg K<sub>2</sub>O ha<sup>-1</sup>, PK<sub>25%</sub>= 18 kg P<sub>2</sub>O<sub>5</sub> ha<sup>-1</sup> + 15 kg K<sub>2</sub>O ha<sup>-1</sup>, PK<sub>0%</sub>= 0 kg P<sub>2</sub>O<sub>5</sub> ha<sup>-1</sup> + 0 kg K<sub>2</sub>O ha<sup>-1</sup>, and compost was added with a rate of 20 t ha<sup>-1</sup>. Total soluble proteins (TSPs), total soluble sugars (TSSs), free proline (FPro), reduced glutathione (GSH), ascorbic acid (AsA), total phenolics (TPs), and 2,2-diphenyl-1-picrylhydrazyl-scavenging activity (DPPH-SA).

Table S7. Individual effect of soil type and compost with phosphate (P)-potassium (K)-solubilizing *Aspergillus niger* (PK+C-AN) level on leaf nutrient (i.e., nitrogen, N; phosphorus, P; potassium, K<sup>+</sup>; calcium, Ca<sup>2+</sup>; iron; Fe<sup>2+</sup>, zinc; Zn<sup>2+</sup>, and manganese; Mn<sup>2+</sup>) contents of quinoa grown in (Si) 2021/22 and (Sii) 2022/23 winter seasons.

| Treatment         | Macro-nutrient                  |                     |                |                     | Micro-nutrient   |                     |                  |
|-------------------|---------------------------------|---------------------|----------------|---------------------|------------------|---------------------|------------------|
|                   | N                               | P                   | K <sup>+</sup> | Ca <sup>2+</sup>    | Fe <sup>2+</sup> | Zn <sup>2+</sup>    | Mn <sup>2+</sup> |
|                   | (mg g <sup>-1</sup> dry weight) |                     |                |                     |                  |                     |                  |
| Season (S)        |                                 |                     |                |                     |                  |                     |                  |
| SI                | 36.6±0.31a                      | 7.61±0.12a          | 47.1±1.02a     | 28.0±0.74a          | 10.5±0.37a       | 4.70±0.05a          | 6.36±0.20b       |
| SII               | 35.3±0.25b                      | 7.64±0.12a          | 45.7±0.82b     | 28.3±0.76a          | 10.2±0.14b       | 4.69±0.05a          | 6.80±0.34a       |
| Soil type (ST)    |                                 |                     |                |                     |                  |                     |                  |
| Normal (Nor)      | 37.0±0.30a                      | 7.69±0.12a          | 48.3±0.89a     | 29.1±0.77a          | 11.0±0.35a       | 4.86±0.05a          | 8.06±0.17a       |
| Calcareous (Calc) | 34.9±0.19b                      | 7.56±0.12b          | 44.5±0.85b     | 27.2±0.69b          | 9.67±0.11b       | 4.53±0.03b          | 5.11±0.07b       |
| PK+C-AN level     |                                 |                     |                |                     |                  |                     |                  |
| PK100%            | 35.1±0.28d                      | 7.23±0.04e          | 43.0±0.89e     | 28.4±0.42d          | 10.2±0.54c       | 4.47±0.04e          | 6.38±0.39d       |
| PK100%+C-AN       | 37.7±0.51a                      | 8.62±0.07a          | 55.3±1.23a     | 33.8±0.55a          | 12.5±0.75a       | 5.02±0.09a          | 7.25±0.55a       |
| PK75%+C-AN        | 37.1±0.53b                      | 8.21±0.06b          | 49.0±0.73b     | 31.2±0.33b          | 10.3±0.19b       | 4.83±0.07b          | 7.00±0.58b       |
| PK50%+C-AN        | 35.9±0.39c                      | 7.75±0.04c          | 46.5±0.55c     | 29.8±0.44c          | 10.1±0.21d       | 4.74±0.05c          | 6.42±0.44c       |
| PK25%+C-AN        | 35.4±0.43d                      | 7.49±0.03d          | 43.7±1.03d     | 24.8±0.36e          | 9.78±0.14e       | 4.66±0.06d          | 6.32±0.46e       |
| PK0%+C-AN         | 34.5±0.35e                      | 6.45±0.08f          | 40.9±0.41f     | 20.9±0.24f          | 9.23±0.12f       | 4.45±0.05e          | 6.12±0.46f       |
| <i>p</i> -value   |                                 |                     |                |                     |                  |                     |                  |
| S                 | <.001**                         | 0.563 <sup>ns</sup> | <.001**        | 0.371 <sup>ns</sup> | <.001**          | 0.876 <sup>ns</sup> | <.001**          |
| ST                | <.001**                         | 0.004**             | <.001**        | <.001**             | <.001**          | <.001**             | <.001**          |
| PK+C-AN           | <.001**                         | <.001**             | <.001**        | <.001**             | <.001**          | <.001**             | <.001**          |

Values are means ± standard error (n=3). \*\* indicates difference at  $p \leq 0.01$  probability level. ns= not significant difference. Mean values for each factor followed by the same lower-case-letter in each column are not significantly different according to the Duncan test ( $p \leq 0.05$ ). PK<sub>100%</sub>= 72 kg P<sub>2</sub>O<sub>5</sub> ha<sup>-1</sup> + 60 kg K<sub>2</sub>O ha<sup>-1</sup>, PK<sub>75%</sub>= 54 kg P<sub>2</sub>O<sub>5</sub> ha<sup>-1</sup> + 45 kg K<sub>2</sub>O ha<sup>-1</sup>, PK<sub>50%</sub>= 36 kg P<sub>2</sub>O<sub>5</sub> ha<sup>-1</sup> + 30 kg K<sub>2</sub>O ha<sup>-1</sup>, PK<sub>25%</sub>= 18 kg P<sub>2</sub>O<sub>5</sub> ha<sup>-1</sup> + 15 kg K<sub>2</sub>O ha<sup>-1</sup>, PK<sub>0%</sub>= 0 kg P<sub>2</sub>O<sub>5</sub> ha<sup>-1</sup> + 0 kg K<sub>2</sub>O ha<sup>-1</sup>, and compost was added with a rate of 20 t ha<sup>-1</sup>.

Table S8. Individual effect of soil type and compost with phosphate (P)-potassium (K)-solubilizing *Aspergillus niger* (PK+C-AN) level on proximate chemical composition of quinoa's seeds grown in (Si) 2021/22 and (SII) 2022/23 winter seasons.

| Treatment         | Crude protein<br>(%) | Ash        | Crude lipid         | Crude fiber | Carbohydrates |
|-------------------|----------------------|------------|---------------------|-------------|---------------|
| Season (S)        |                      |            |                     |             |               |
| SI                | 14.4±0.22a           | 2.80±0.10a | 6.56±0.05a          | 3.50±0.04b  | 65.2±0.46b    |
| SII               | 14.0±0.21b           | 2.66±0.09b | 5.91±0.05b          | 3.68±0.05a  | 67.0±0.44a    |
| Soil type (ST)    |                      |            |                     |             |               |
| Normal (Nor)      | 15.3±0.09a           | 2.60±0.10b | 6.04±0.07b          | 3.81±0.04a  | 63.7±0.24b    |
| Calcareous (Calc) | 13.1±0.13b           | 2.86±0.09a | 6.42±0.06a          | 3.38±0.02b  | 68.6±0.25a    |
| PK+C-AN level     |                      |            |                     |             |               |
| PK100%            | 13.3±0.42d           | 2.30±0.09e | 6.13±0.12a          | 3.41±0.06f  | 67.8±1.03a    |
| PK100%+C-AN       | 14.2±0.56c           | 3.43±0.08a | 6.25±0.12a          | 3.44±0.06e  | 65.4±0.97d    |
| PK75%+C-AN        | 14.3±0.29c           | 3.13±0.07b | 6.29±0.13a          | 3.53±0.06d  | 65.8±0.65c    |
| PK50%+C-AN        | 14.4±0.30b           | 2.96±0.03c | 6.16±0.16a          | 3.61±0.07c  | 65.6±0.81cd   |
| PK25%+C-AN        | 14.6±0.32a           | 2.51±0.04d | 6.37±0.15a          | 3.74±0.08b  | 65.8±0.80c    |
| PK0%+C-AN         | 14.4±0.15b           | 2.03±0.17f | 6.21±0.10a          | 3.83±0.10a  | 66.4±0.45b    |
| <i>p</i> -value   |                      |            |                     |             |               |
| S                 | <.001**              | <.001**    | <.001**             | <.001**     | <.001**       |
| ST                | <.001**              | <.001**    | <.001**             | <.001**     | <.001**       |
| PK+C-AN           | <.001**              | <.001**    | 0.119 <sup>ns</sup> | <.001**     | <.001**       |

Values are means ± standard error (n=3). \*\* indicates difference at  $p \leq 0.01$  probability level. ns= not significant difference. Mean values for each factor followed by the same lower-case-letter in each column are not significantly different according to the Duncan test ( $p \leq 0.05$ ). PK<sub>100%</sub>= 72 kg P<sub>2</sub>O<sub>5</sub> ha<sup>-1</sup> + 60 kg K<sub>2</sub>O ha<sup>-1</sup>, PK<sub>75%</sub>= 54 kg P<sub>2</sub>O<sub>5</sub> ha<sup>-1</sup> + 45 kg K<sub>2</sub>O ha<sup>-1</sup>, PK<sub>50%</sub>= 36 kg P<sub>2</sub>O<sub>5</sub> ha<sup>-1</sup> + 30 kg K<sub>2</sub>O ha<sup>-1</sup>, PK<sub>25%</sub>= 18 kg P<sub>2</sub>O<sub>5</sub> ha<sup>-1</sup> + 15 kg K<sub>2</sub>O ha<sup>-1</sup>, PK<sub>0%</sub>= 0 kg P<sub>2</sub>O<sub>5</sub> ha<sup>-1</sup> + 0 kg K<sub>2</sub>O ha<sup>-1</sup>, and compost was added with a rate of 20 t ha<sup>-1</sup>.



Table S9. Individual effect of soil type and compost with phosphate (P)-potassium (K)-solubilizing *Aspergillus niger* (PK+C-AN) level on phytochemicals and antioxidant activity of quinoa's seeds grown in (Si) 2021/22 and (Sii) 2022/23 winter seasons.

| Treatment         | TPC<br>(mg 100 <sup>-1</sup> g dry seed) | TFC        | IC50 (mg ml <sup>-1</sup> ) | ARP        |
|-------------------|------------------------------------------|------------|-----------------------------|------------|
| Season (S)        |                                          |            |                             |            |
| SI                | 66.6±1.58b                               | 31.4±1.21b | 0.42±0.01b                  | 2.42±0.06b |
| SII               | 68.6±1.63a                               | 32.7±1.26a | 0.44±0.01a                  | 2.50±0.06a |
| Soil type (ST)    |                                          |            |                             |            |
| Normal (Nor)      | 70.6±1.60a                               | 34.1±1.06a | 0.46±0.01a                  | 2.30±0.05b |
| Calcareous (Calc) | 64.6±1.46b                               | 30.0±1.31b | 0.40±0.01b                  | 2.63±0.06a |
| PK+C-AN level     |                                          |            |                             |            |
| PK100%            | 61.6±1.37d                               | 24.9±0.51f | 0.39±0.01e                  | 2.18±0.03e |
| PK100%+C-AN       | 80.9±1.01a                               | 44.1±0.32a | 0.51±0.01a                  | 2.99±0.07a |
| PK75%+C-AN        | 71.6±1.17b                               | 37.8±0.79b | 0.48±0.01b                  | 2.67±0.08b |
| PK50%+C-AN        | 72.3±1.03b                               | 31.9±0.60c | 0.45±0.01c                  | 2.58±0.05c |
| PK25%+C-AN        | 66.8±0.99c                               | 27.7±0.83d | 0.40±0.01d                  | 2.31±0.04d |
| PK0%+C-AN         | 52.6±0.40e                               | 26.0±1.23e | 0.35±0.01f                  | 2.03±0.04f |
| p-value           |                                          |            |                             |            |
| S                 | <.001**                                  | <.001**    | <.001**                     | <.001**    |
| ST                | <.001**                                  | <.001**    | <.001**                     | <.001**    |
| PK+C-AN           | <.001**                                  | <.001**    | <.001**                     | <.001**    |

Values are means ± standard error (n=3). \*\* indicate differences at  $p \leq 0.01$  probability level, respectively. ns= not significant difference. Mean values for each factor followed by the same lower-case-letter in each column are not significantly different according to the Duncan test ( $p \leq 0.05$ ). PK<sub>100%</sub>= 72 kg P<sub>2</sub>O<sub>5</sub> ha<sup>-1</sup> + 60 kg K<sub>2</sub>O ha<sup>-1</sup>, PK<sub>75%</sub>= 54 kg P<sub>2</sub>O<sub>5</sub> ha<sup>-1</sup> + 45 kg K<sub>2</sub>O ha<sup>-1</sup>, PK<sub>50%</sub>= 36 kg P<sub>2</sub>O<sub>5</sub> ha<sup>-1</sup> + 30 kg K<sub>2</sub>O ha<sup>-1</sup>, PK<sub>25%</sub>= 18 kg P<sub>2</sub>O<sub>5</sub> ha<sup>-1</sup> + 15 kg K<sub>2</sub>O ha<sup>-1</sup>, PK<sub>0%</sub>= 0 kg P<sub>2</sub>O<sub>5</sub> ha<sup>-1</sup> + 0 kg K<sub>2</sub>O ha<sup>-1</sup>, and compost was added with a rate of 20 t ha<sup>-1</sup>. Total phenolic compounds (TPC), total flavonoid compounds (TFC), half-maximal inhibitory concentration (IC<sub>50</sub>), and anti-radical power (ARP).

Table S10. Individual effect of soil type and compost with phosphate (P)-potassium (K)-solubilizing *Aspergillus niger* (PK+C-AN) level on seed mineral (i.e., phosphorus, P; potassium, K<sup>+</sup>; calcium, Ca<sup>2+</sup>; magnesium; Mg<sup>2+</sup>, sodium; Na<sup>+</sup>, iron; Fe<sup>2+</sup>, and zinc; Zn<sup>2+</sup>) contents of quinoa grown in (Si) 2021/22 and (SII) 2022/23 winter seasons.

| Treatment         | P                                | K <sup>+</sup> | Ca <sup>2+</sup>    | Mg <sup>2+</sup> | Na <sup>+</sup> | Fe <sup>2+</sup> | Zn <sup>2+</sup> |
|-------------------|----------------------------------|----------------|---------------------|------------------|-----------------|------------------|------------------|
|                   | (g 100 <sup>-1</sup> g dry seed) |                |                     |                  |                 |                  |                  |
| Season (S)        |                                  |                |                     |                  |                 |                  |                  |
| SI                | 0.37±0.01a                       | 2.59±0.06a     | 1.52±0.04a          | 0.96±0.05a       | 0.29±0.01a      | 0.90±0.01b       | 0.45±0.00b       |
| SII               | 0.37±0.01a                       | 2.51±0.05b     | 1.55±0.04a          | 0.72±0.02b       | 0.25±0.01b      | 0.99±0.02a       | 0.48±0.00a       |
| Soil type (ST)    |                                  |                |                     |                  |                 |                  |                  |
| Normal (Nor)      | 0.38±0.01a                       | 2.66±0.05a     | 1.62±0.04a          | 0.95±0.05a       | 0.31±0.01a      | 0.96±0.02a       | 0.47±0.00a       |
| Calcareous (Calc) | 0.36±0.01b                       | 2.45±0.05b     | 1.44±0.04b          | 0.74±0.02b       | 0.23±0.01b      | 0.93±0.02b       | 0.46±0.00b       |
| PK+C-AN level     |                                  |                |                     |                  |                 |                  |                  |
| PK100%            | 0.35±0.00d                       | 2.36±0.05e     | 1.53±0.03c          | 0.76±0.04e       | 0.25±0.02d      | 0.87±0.02e       | 0.45±0.00d       |
| PK100%+C-AN       | 0.48±0.00a                       | 3.04±0.07a     | 1.84±0.04a          | 1.14±0.11a       | 0.32±0.02a      | 1.11±0.04a       | 0.48±0.01a       |
| PK75%+C-AN        | 0.43±0.01b                       | 2.70±0.04b     | 1.65±0.03b          | 0.94±0.07b       | 0.30±0.01b      | 1.00±0.02b       | 0.47±0.01b       |
| PK50%+C-AN        | 0.41±0.01c                       | 2.55±0.03c     | 1.60±0.03b          | 0.81±0.04c       | 0.27±0.01c      | 0.95±0.01c       | 0.46±0.01c       |
| PK25%+C-AN        | 0.32±0.01e                       | 2.40±0.06d     | 1.44±0.02d          | 0.77±0.04d       | 0.25±0.01d      | 0.91±0.01d       | 0.46±0.01c       |
| PK0%+C-AN         | 0.25±0.01f                       | 2.25±0.02f     | 1.13±0.03e          | 0.64±0.01f       | 0.21±0.02e      | 0.84±0.01f       | 0.44±0.00e       |
| p-value           |                                  |                |                     |                  |                 |                  |                  |
| S                 | 0.189 <sup>ns</sup>              | <.001**        | 0.382 <sup>ns</sup> | <.001**          | <.001**         | <.001**          | <.001**          |
| ST                | 0.014**                          | <.001**        | <.001**             | <.001**          | <.001**         | <.001**          | <.001**          |
| PK+C-AN           | <.001**                          | <.001**        | <.001**             | <.001**          | <.001**         | <.001**          | <.001**          |

Values are means ± standard error (n=3). \*\* indicates difference at  $p \leq 0.01$  probability level. ns= not significant difference. Mean values for each factor followed by the same lower-case-letter in each column are not significantly different according to the Duncan test ( $p \leq 0.05$ ). PK<sub>100%</sub>= 72 kg P<sub>2</sub>O<sub>5</sub> ha<sup>-1</sup> + 60 kg K<sub>2</sub>O ha<sup>-1</sup>, PK<sub>75%</sub>= 54 kg P<sub>2</sub>O<sub>5</sub> ha<sup>-1</sup> + 45 kg K<sub>2</sub>O ha<sup>-1</sup>, PK<sub>50%</sub>= 36 kg P<sub>2</sub>O<sub>5</sub> ha<sup>-1</sup> + 30 kg K<sub>2</sub>O ha<sup>-1</sup>, PK<sub>25%</sub>= 18 kg P<sub>2</sub>O<sub>5</sub> ha<sup>-1</sup> + 15 kg K<sub>2</sub>O ha<sup>-1</sup>, PK<sub>0%</sub>= 0 kg P<sub>2</sub>O<sub>5</sub> ha<sup>-1</sup> + 0 kg K<sub>2</sub>O ha<sup>-1</sup>, and compost was added with a rate of 20 t ha<sup>-1</sup>.

Table S11. Individual effect of soil type and compost with phosphate (P)-potassium (K)-solubilizing *Aspergillus niger* (PK+C-AN) level on total microbial community at the end of experiment in rhizosphere soil, seed yield and seed yield-related attributes of quinoa grown in (Si) 2021/22 and (Sii) 2022/23 winter seasons.

| Treatment         | PSMs<br>(CFU× 10 <sup>3</sup> g <sup>-1</sup> soil) | <i>Azotobacter</i> sp. | Plant height<br>(cm) | Plant dry<br>weight (g) | HW (kg hL <sup>-1</sup> ) | Seed yield<br>(t ha <sup>-1</sup> ) | Biological          | HI (%)              |
|-------------------|-----------------------------------------------------|------------------------|----------------------|-------------------------|---------------------------|-------------------------------------|---------------------|---------------------|
| Season (S)        |                                                     |                        |                      |                         |                           |                                     |                     |                     |
| SI                | 2.43±0.40b                                          | 3.73±0.58a             | 98.3±1.7a            | 22.7±1.3a               | 68.7±0.4a                 | 2.41±0.09a                          | 5.17±0.26a          | 48.2±1.2a           |
| SII               | 2.57±0.42a                                          | 3.72±0.52a             | 96.1±2.0b            | 22.2±1.2a               | 68.8±0.2a                 | 2.25±0.10a                          | 4.78±0.23a          | 47.8±1.0a           |
| Soil type (ST)    |                                                     |                        |                      |                         |                           |                                     |                     |                     |
| Normal (Nor)      | 3.00±0.10a                                          | 5.08±0.66a             | 106.7±0.9a           | 28.4±0.9a               | 68.4±0.3b                 | 2.58±0.10a                          | 5.98±0.23a          | 43.5±0.9b           |
| Calcareous (Calc) | 2.00±0.56b                                          | 2.37±0.25b             | 87.8±1.0b            | 16.5±0.6b               | 69.0±0.4a                 | 2.09±0.07b                          | 3.97±0.12b          | 52.5±0.7a           |
| PK+C-AN level     |                                                     |                        |                      |                         |                           |                                     |                     |                     |
| PK100%            | 1.50±0.45d                                          | 3.30±0.05c             | 88.6±2.6e            | 19.8±2.1d               | 67.6±0.3d                 | 1.91±0.10d                          | 3.98±0.32e          | 49.0±1.5a           |
| PK100%+C-AN       | 2.00±0.60c                                          | 8.80±1.32a             | 102.8±3.1a           | 30.2±2.7a               | 71.2±0.6a                 | 2.88±0.12a                          | 6.25±0.45a          | 47.4±1.7ab          |
| PK75%+C-AN        | 1.50±0.45d                                          | 3.80±0.48b             | 100.8±2.8b           | 24.5±1.7b               | 69.4±0.2b                 | 2.81±0.12a                          | 5.76±0.39b          | 49.7±1.3a           |
| PK50%+C-AN        | 1.50±0.45d                                          | 3.92±0.34b             | 99.8±2.8b            | 21.9±1.4c               | 68.8±0.4c                 | 2.64±0.12b                          | 5.44±0.42c          | 50.0±2.1a           |
| PK25%+C-AN        | 3.00±0.03b                                          | 1.83±0.37d             | 97.8±3.0c            | 20.2±1.2d               | 68.3±0.3c                 | 2.07±0.08c                          | 4.72±0.26d          | 44.9±2.5b           |
| PK0%+C-AN         | 5.50±1.06a                                          | 0.70±0.03e             | 93.5±3.5d            | 18.0±1.7e               | 67.0±0.3e                 | 1.70±0.05e                          | 3.70±0.21e          | 46.9±2.1ab          |
| p-value           |                                                     |                        |                      |                         |                           |                                     |                     |                     |
| S                 | 0.011**                                             | 0.967 <sup>ns</sup>    | 0.045*               | 0.207 <sup>ns</sup>     | 0.616 <sup>ns</sup>       | 0.117 <sup>ns</sup>                 | 0.160 <sup>ns</sup> | 0.684 <sup>ns</sup> |
| ST                | <.001**                                             | <.001**                | <.001**              | <.001**                 | 0.009**                   | <.001**                             | <.001**             | 0.002**             |

Values are means ± standard error (n=3). \* and \*\* indicate differences at  $p \leq 0.05$  and  $p \leq 0.01$  probability level, respectively. ns= not significant difference. Mean values for each factor followed by the same lower-case-letter in each column are not significantly different according to the Duncan test ( $p \leq 0.05$ ). PK100%= 72 kg P<sub>2</sub>O<sub>5</sub> ha<sup>-1</sup> + 60 kg K<sub>2</sub>O ha<sup>-1</sup>, PK75%= 54 kg P<sub>2</sub>O<sub>5</sub> ha<sup>-1</sup> + 45 kg K<sub>2</sub>O ha<sup>-1</sup>, PK50%= 36 kg P<sub>2</sub>O<sub>5</sub> ha<sup>-1</sup> + 30 kg K<sub>2</sub>O ha<sup>-1</sup>, PK25%= 18 kg P<sub>2</sub>O<sub>5</sub> ha<sup>-1</sup> + 15 kg K<sub>2</sub>O ha<sup>-1</sup>, PK0%= 0 kg P<sub>2</sub>O<sub>5</sub> ha<sup>-1</sup> + 0 kg K<sub>2</sub>O ha<sup>-1</sup>, and compost was added with a rate of 20 t ha<sup>-1</sup>. Phosphorus solubilizing microorganisms (PSMs), hectoliter weight (HW) and harvest index (HI).

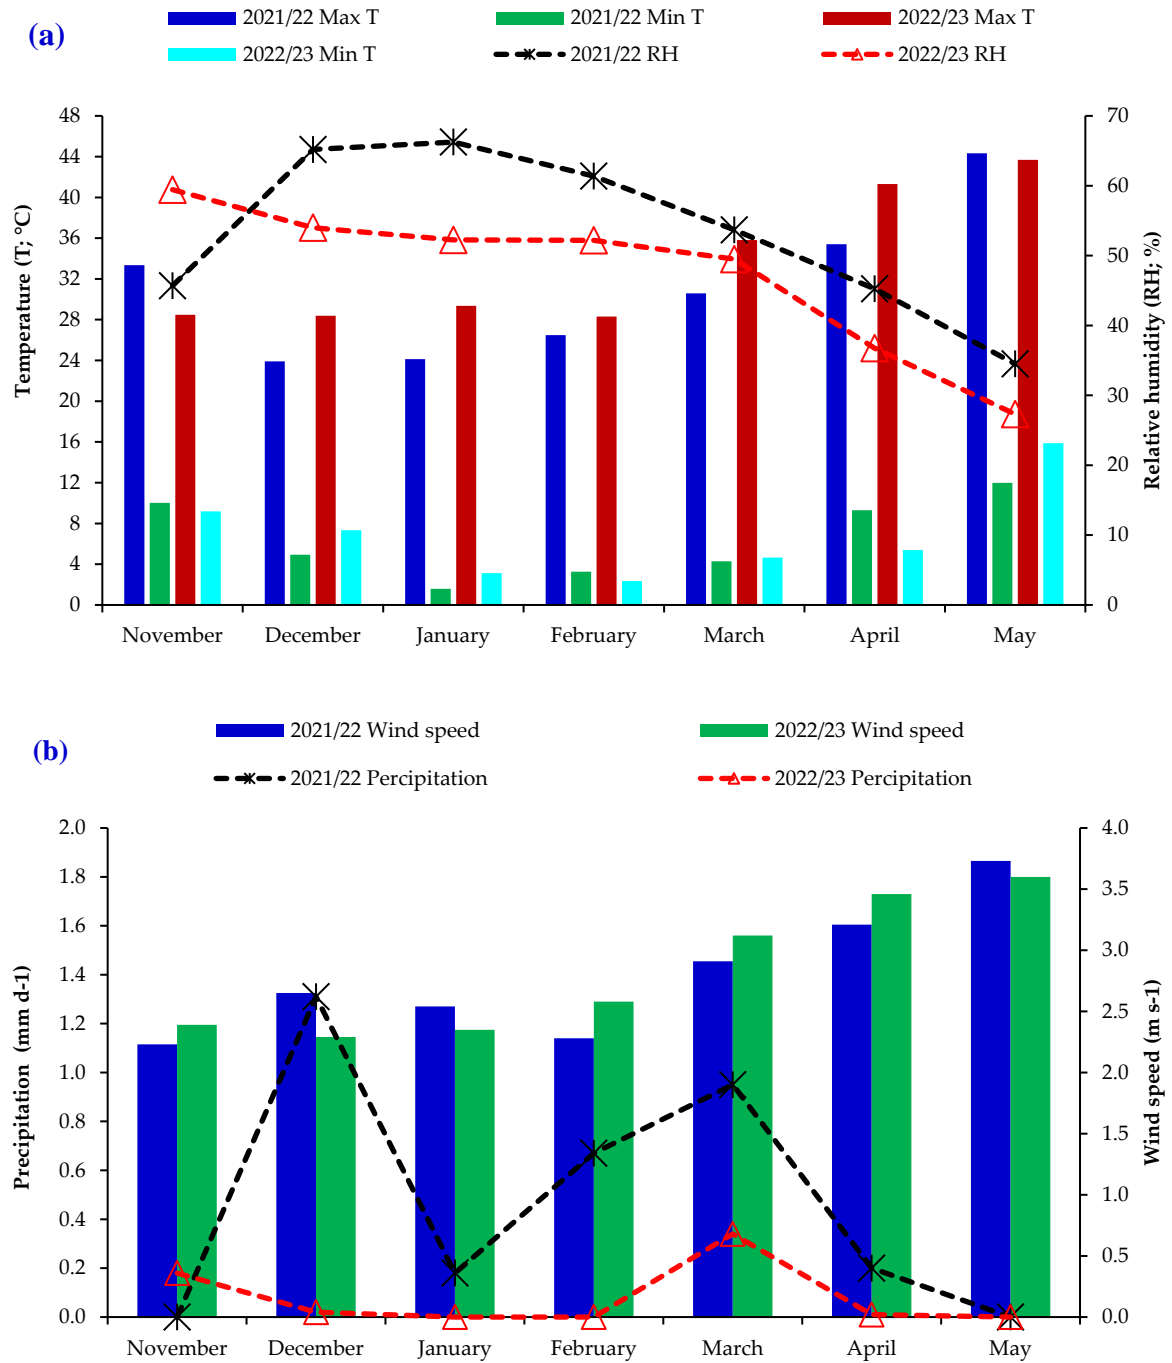

Figure S1. Monthly data of agro-climatic parameters [Maximum (Max) and Minimum (Min) temperatures and relative humidity (a), and precipitation and wind speed (b)] of the experimental location during the 2021/22 and 2022/23 winter growing seasons.
